# Supplementary material for: Synthesis and catalytic application of magnesium complexes bearing pendant indolyl ligands
Source: Royal Society of Chemistry journal article supplement (doi:10.1039/c5dt01173f), 2015-01-01
Supplement: c5dt01173f1.pdf [file c5dt01173f1.pdf]

Supporting Information

## **Synthesis and Catalytic Application of Magnesium Complexes Bearing Pendant Indolyl**

### **Ligands**

Kuo-Fu Peng, Yun Chen and Chi-Tien Chen\*

*Department of Chemistry, National Chung Hsing University, Taichung 402, Taiwan.*

*E-mail: ctchen@dragon.nchu.edu.tw*

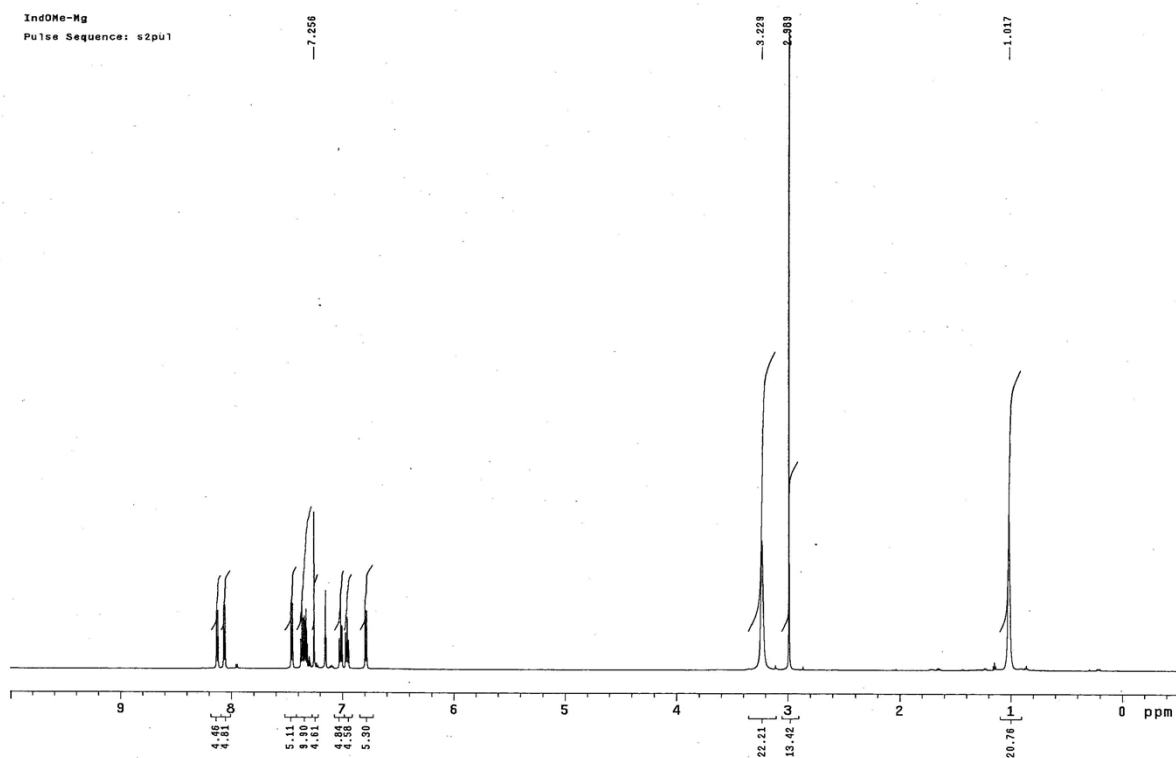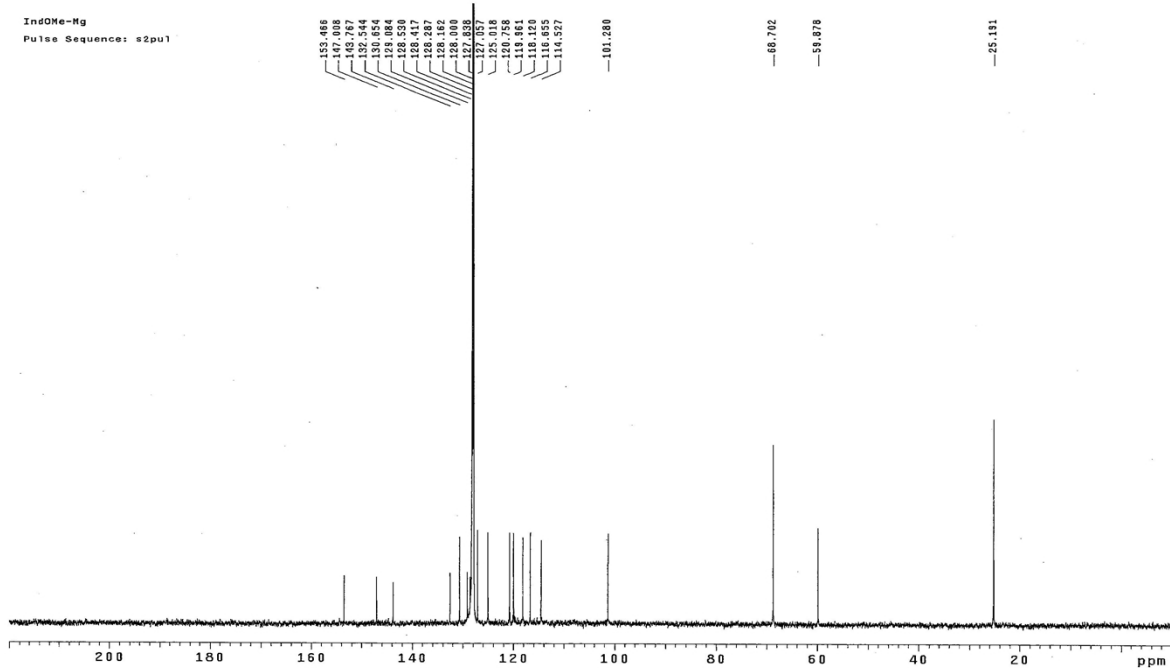

Figure S1. NMR spectra of 3a.

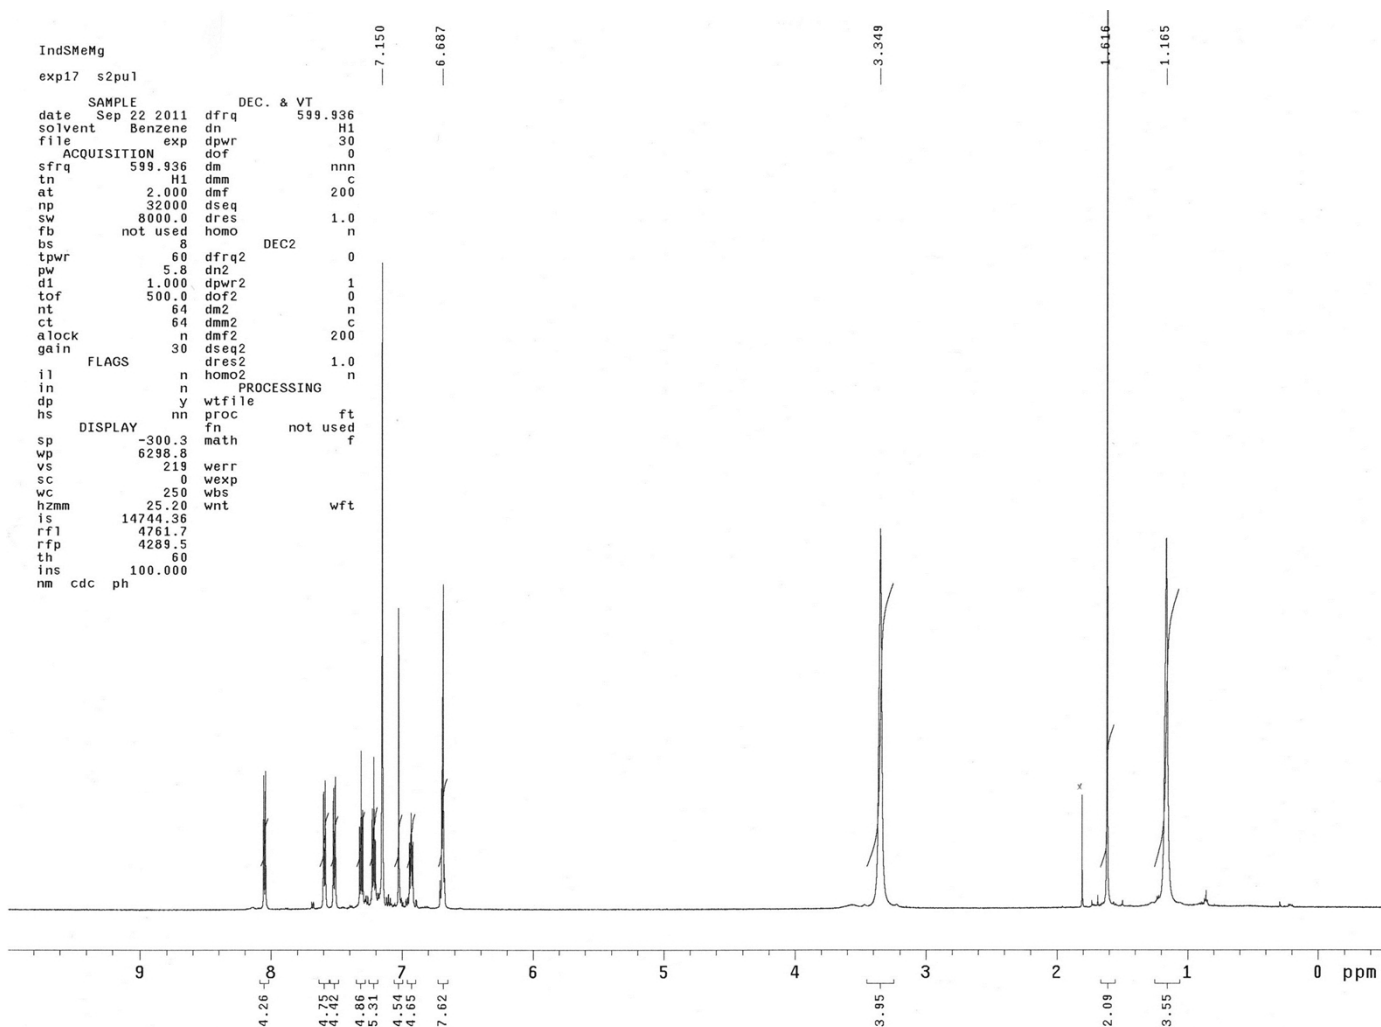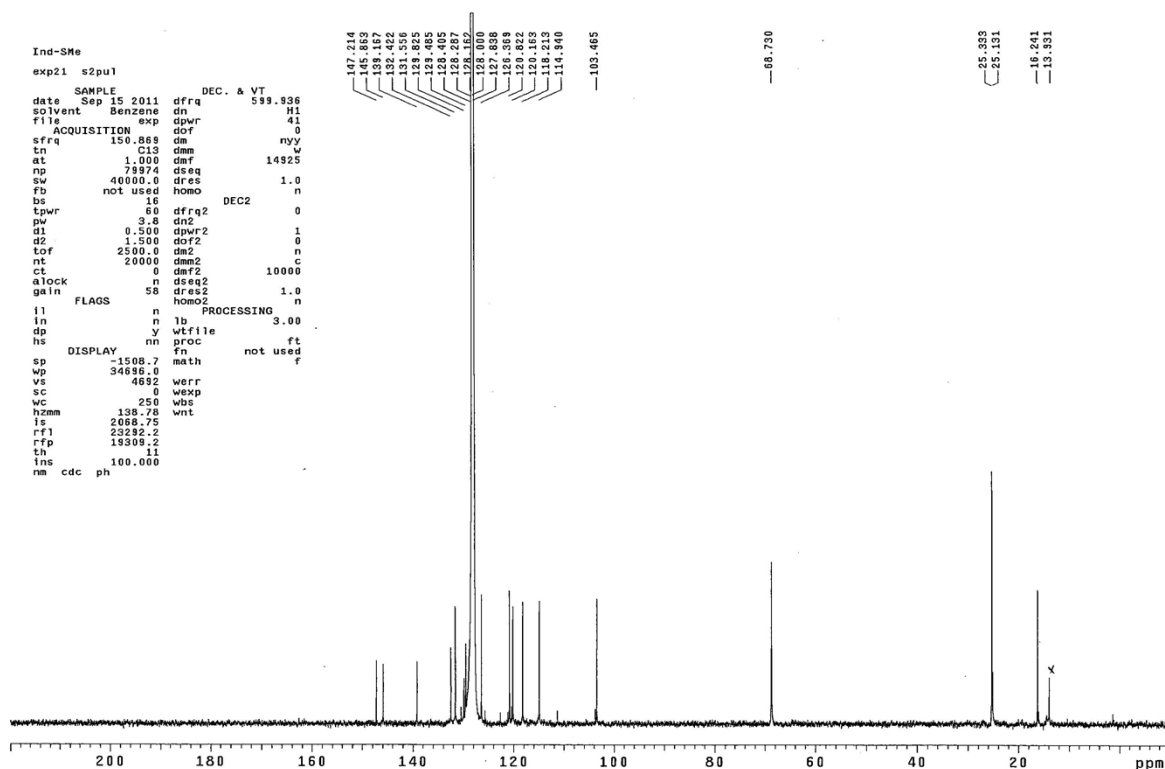

Figure S2. NMR spectra of 3b.

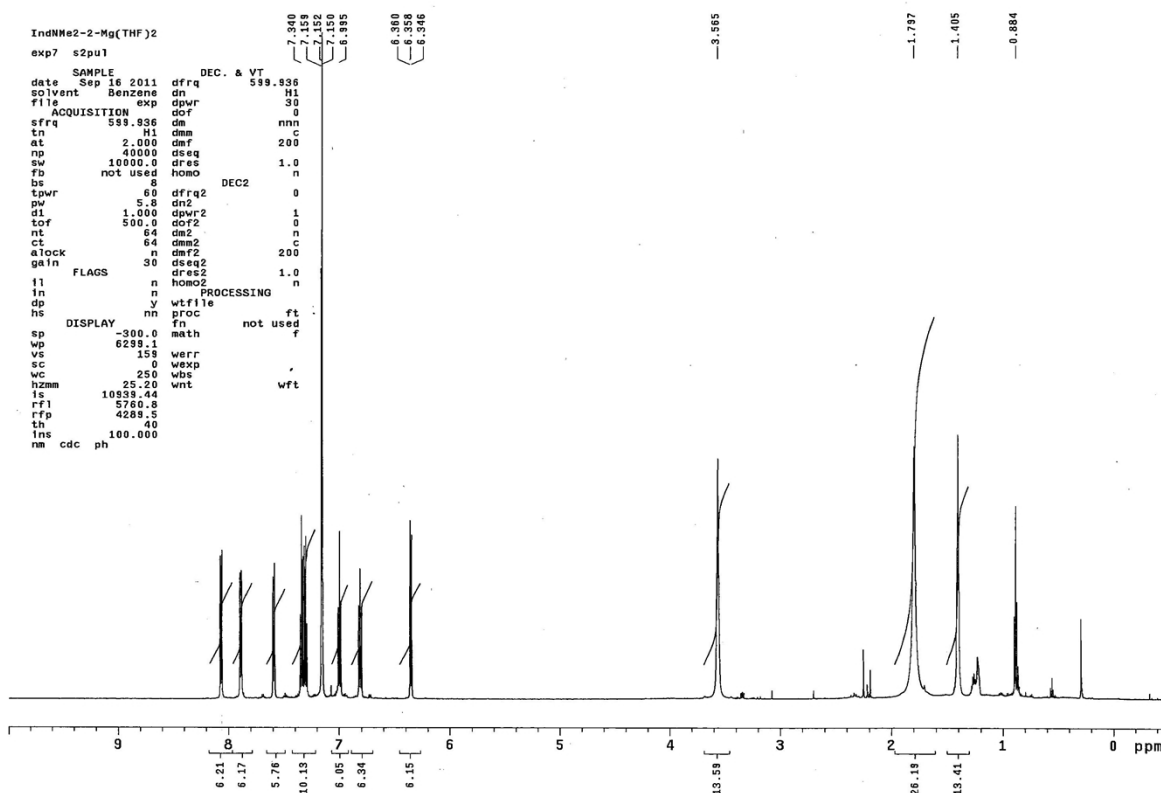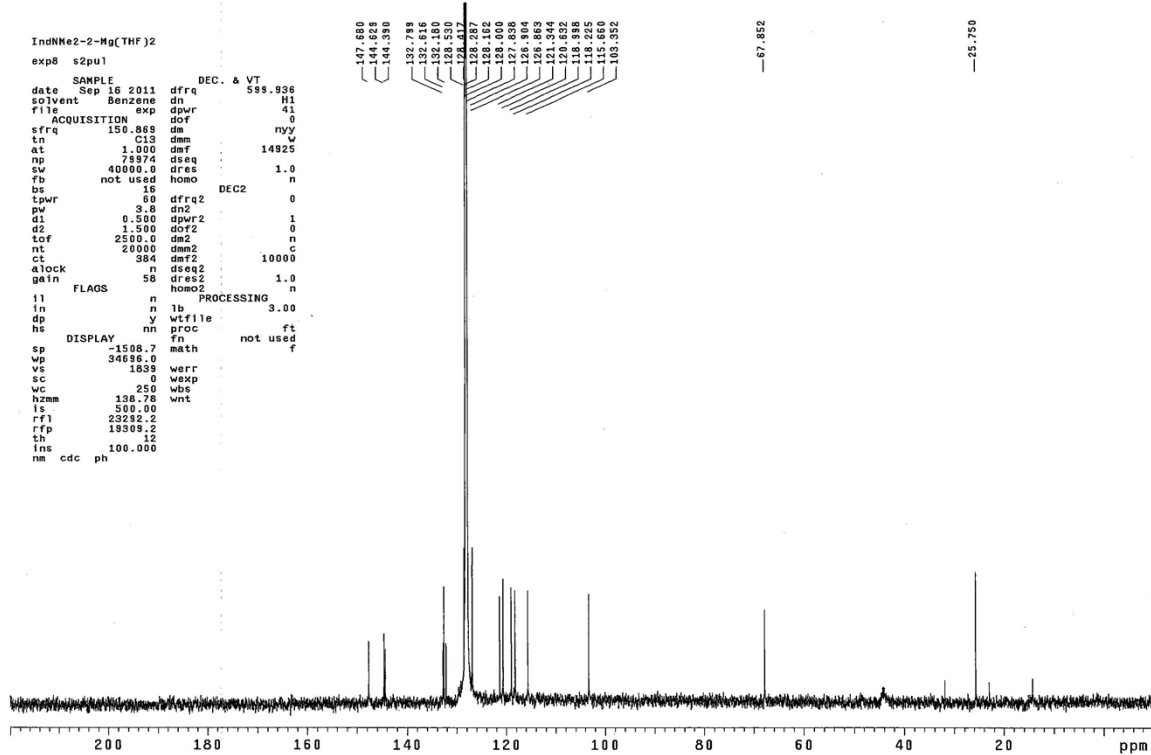

Figure S3 NMR spectra of **3c**.

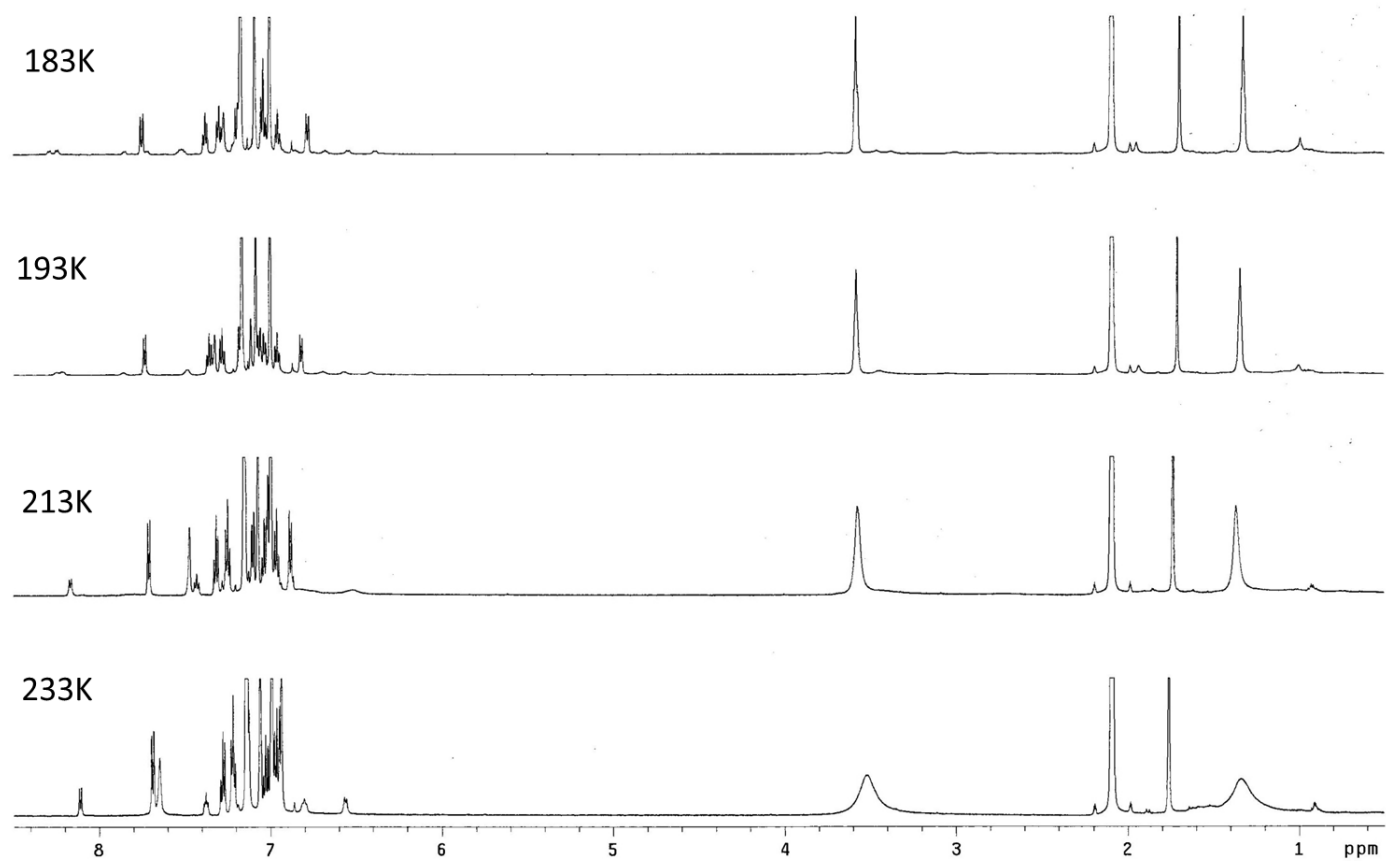

**Figure S4** Variable temperature  $^1\text{H}$  NMR spectra for **3b** were performed in  $d_8$ -toluene.

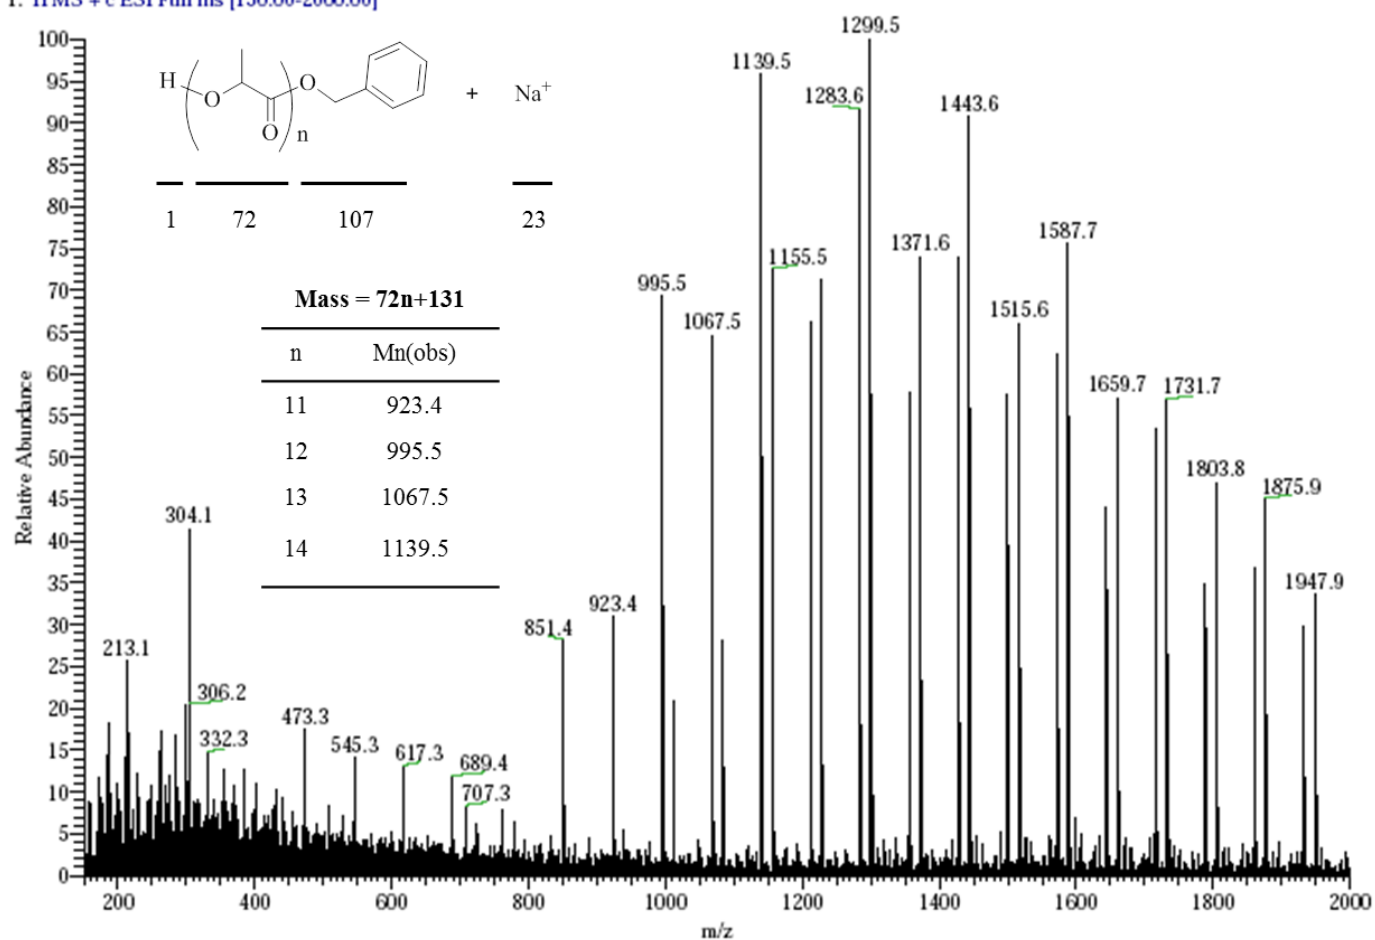

**Figure S5** ESI mass spectrum of the oligomer of L-lactide using **3b** as catalyst (doped with  $\text{Na}^+$ ). Conditions:  $[\text{LA}]_0:[\text{3b}]:[\text{BnOH}]=10:1:1$  in 2.5 mL  $\text{CH}_2\text{Cl}_2$ , at  $0^\circ\text{C}$ , 8 min, 89%.
